# Supplementary material
Source: Springer Nature journal article supplement (https://www.springermedizin.de/resource/supplementary/13099_2009_14_MOESM4_ESM.pdf/9665330)

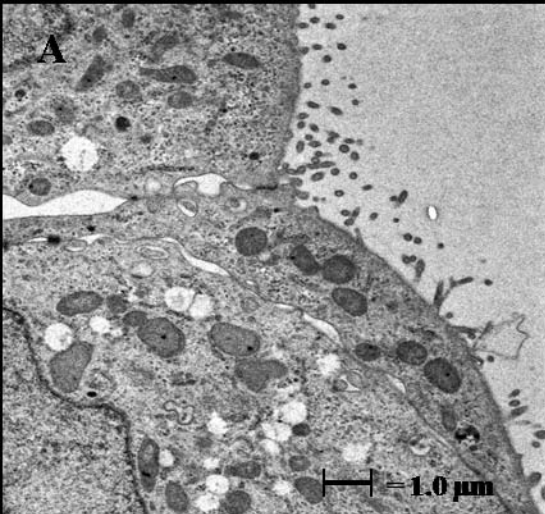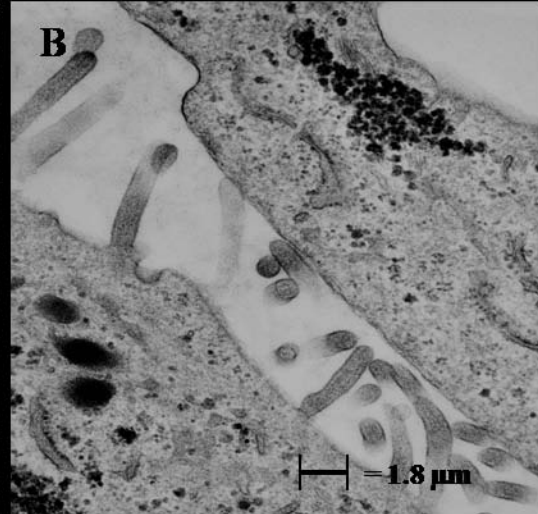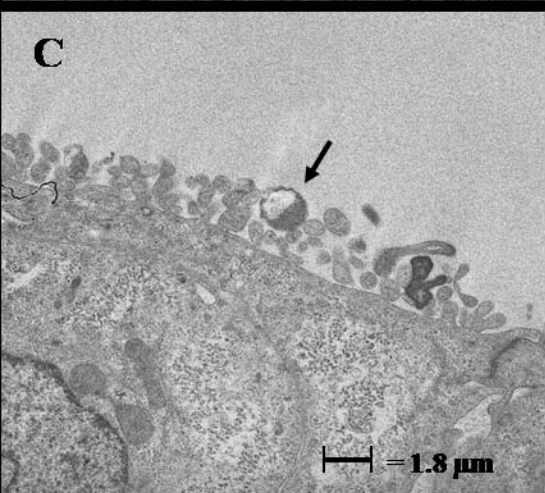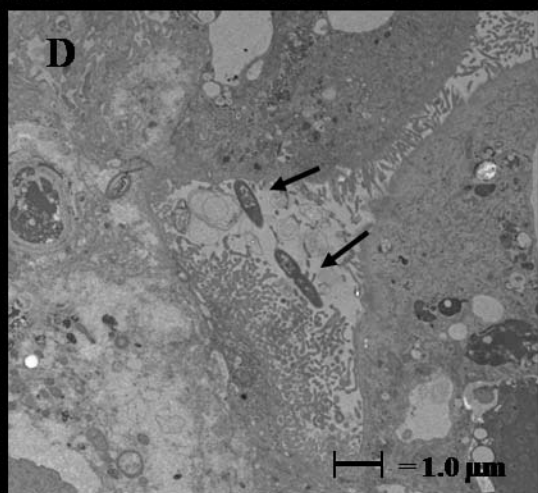

Supplement: MOESM4 [file 9665330]
